# Supplementary material
Source: publisher site journal article supplement (https://www.dovepress.com/article/354896)
Supplement: Supplementary file 1 [file get_supplementary_file.php]

Supplementary Information

NCOA4-mediated ferroptosis in bronchial epithelial cells promotes macrophage M2 polarization in COPD emphysema

**This file includes:**

**Supplementary Figure 1-2**

**
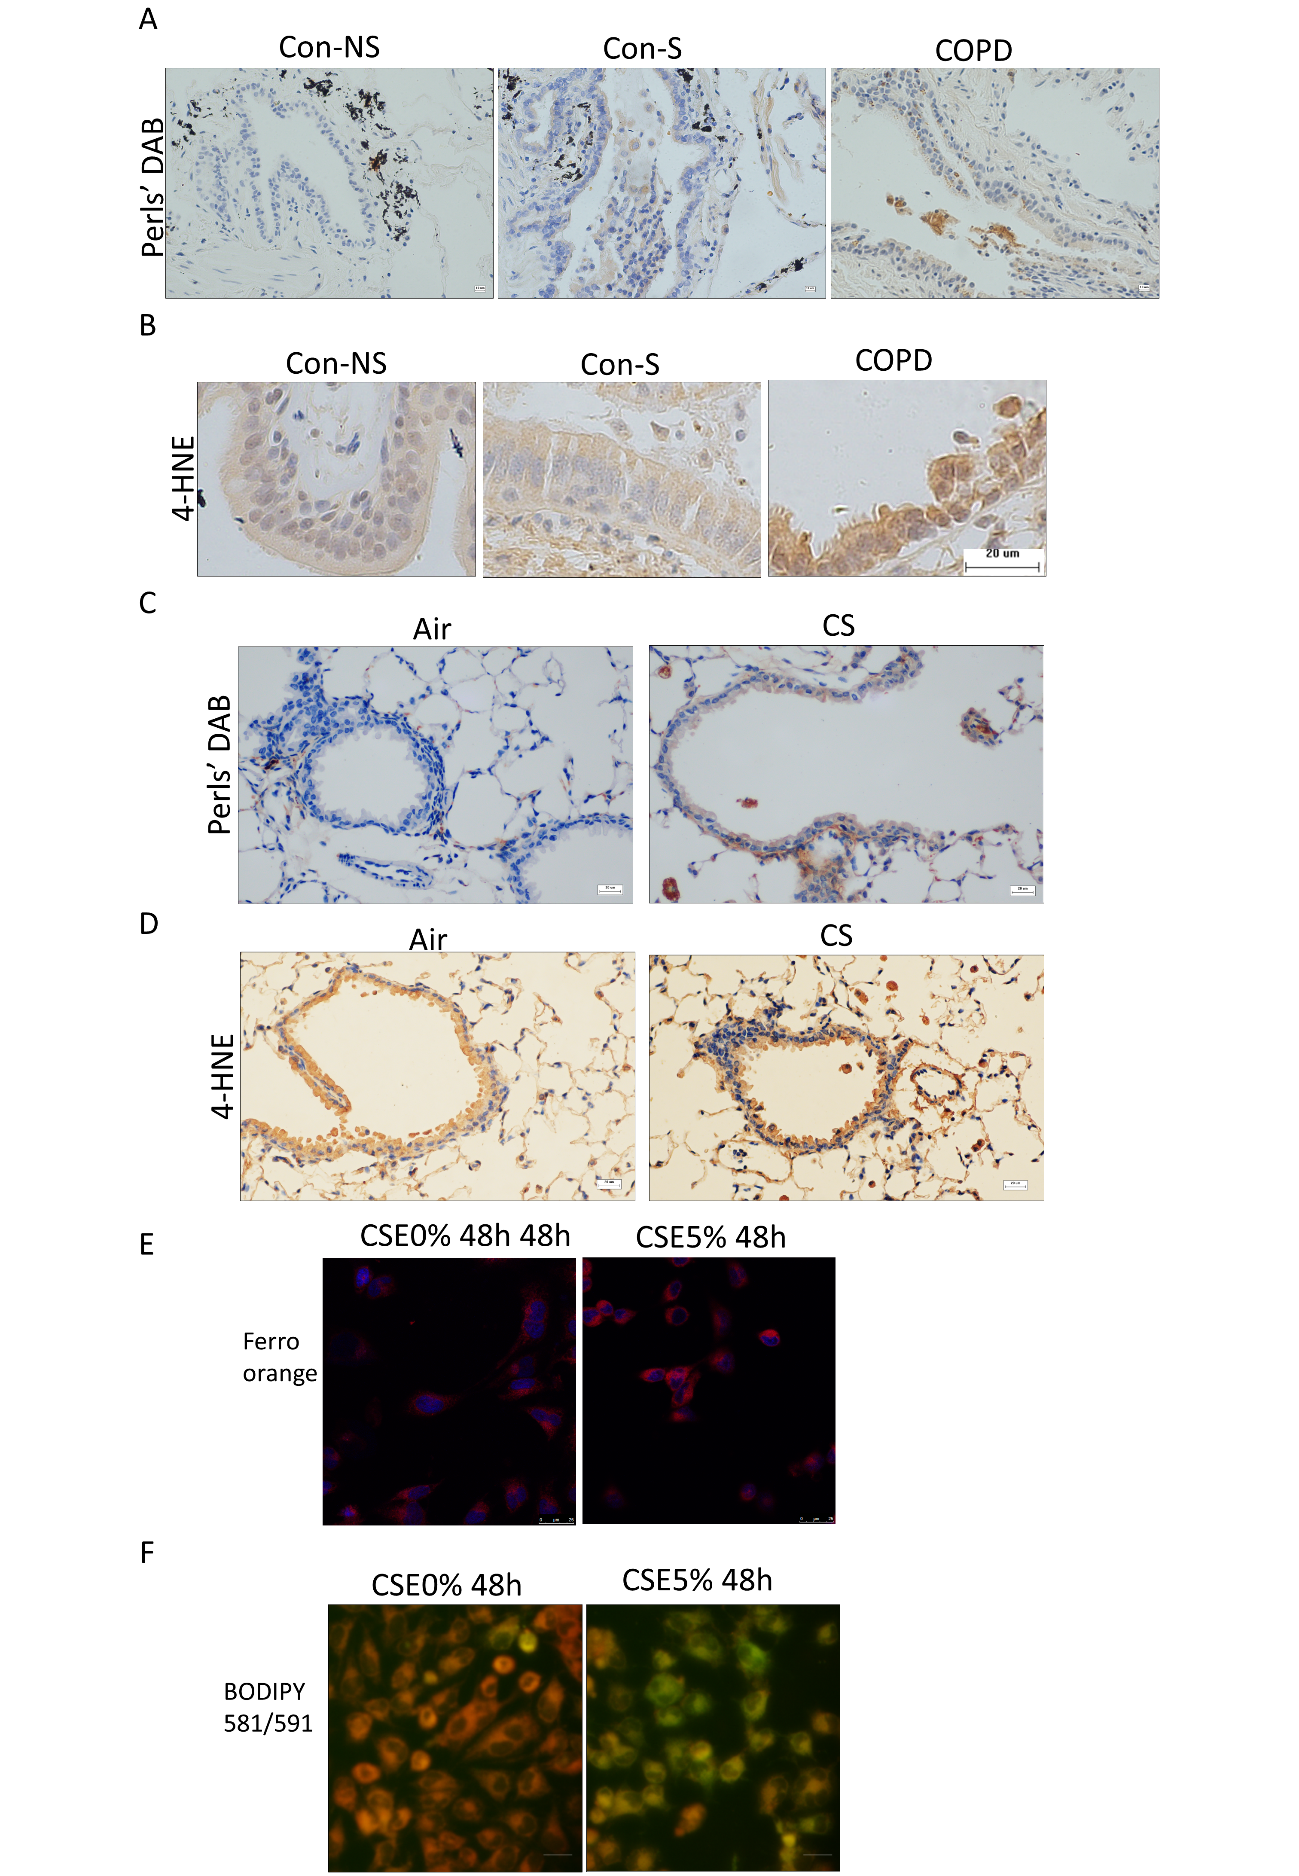
**

**Supplementary Figure 1.**CS-induced increased iron and lipid peroxidation in in COPD patients, CS-exposed mice and CHBE cells. (A) Ferric iron deposits in patient lung samples were stained with Perls’ DAB. Counterstaining was performed with Fast red. Scale bars, 10 μm. (B) IHC staining of 4-HNE in Con-NS (n=4), Con-S (n=5), and COPD (n=6) samples. Scale bars, 20 μm. (C) and (D) Perls’ DAB and 4-HNE staining of mouse lung sections (n=6). Scale bars, 20 μm. HBE cells were treated with saline or 5% CSE for 48h.(E) Free iron was assessed by red fluorescence using the FerroOrange assay. Scale bar, 25 µm. (F) Lipid peroxidation analysis in CHBE cells using the lipophilic redox-sensitive dye BODIPY 581/591, which shifts its fluorescence from red to green in response to oxidation. Scale bar, 100 µm. *P<0.05; **P < 0.01


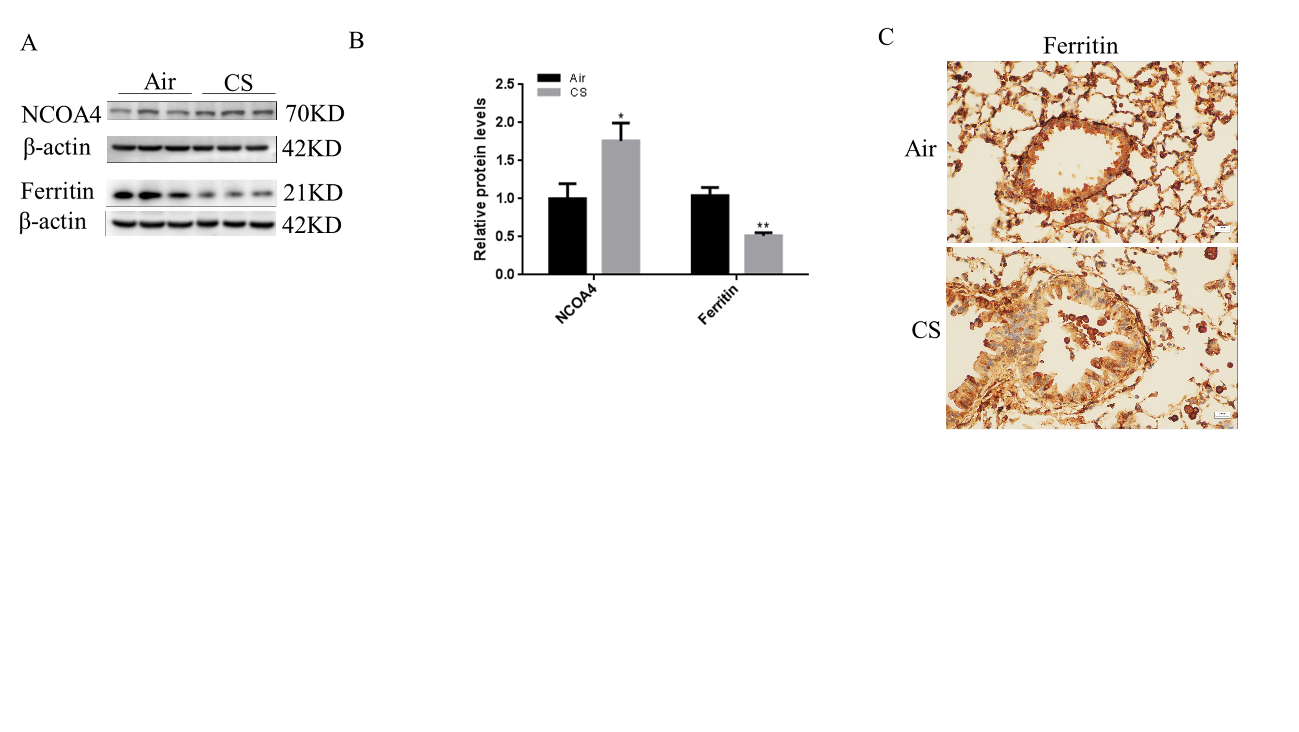


**Supplementary Figure2.**Wild-type (WT) mice were exposed to air or CS for 24 weeks. (A) Western blotting was performed, and (B) the relative protein levels of NCOA4 and ferritin in the lung were determined. (C) IHC staining of ferritin is shown. *P<0.05; **P < 0.01
